# Supplementary material for: Comparison of the White-Nose Syndrome Agent Pseudogymnoascus destructans to Cave-Dwelling Relatives Suggests Reduced Saprotrophic Enzyme Activity
Source: PLoS One. 2014 Jan 22;9(1):e86437. doi: 10.1371/journal.pone.0086437 (PMC3899275; doi:10.1371/journal.pone.0086437)
Supplement: Table S1 — Collection information and Genbank accession numbers for strains used in assessing phylogenetic diversity. (XLSX) [file pone.0086437.s001.xlsx]

## Sheet: Sheet1
Isolate	Species	Collection	Origin	Location	ITS	MCM7	TEF1
01NH01	Leuconeurospora	FCMR	cave sediment	New Hampshire, USA	JX270336	KF017645	KF017754
01NH04	Leuconeurospora	FCMR	cave sediment	New Hampshire, USA	JX270339	KF017646	KF017755
01NH08	Pseudogymnoascus sp.	FCMR	cave sediment	New Hampshire, USA	JX270343	KF017647	KF017756
02NH04	Leuconeurospora	FCMR	cave sediment	New Hampshire, USA	JX270349	KF017648	KF017757
02NH05	Pseudogymnoascus sp.	FCMR	cave sediment	New Hampshire, USA	JX270350	KF017649	KF017758
02NH11	Pseudogymnoascus sp.	FCMR	cave sediment	New Hampshire, USA	JX270356	KF017650	KF017759
03VT05	Pseudogymnoascus sp.	FCMR	cave sediment	Vermont, USA	KF039892	KF017651	KF017760
04NY11	Pseudogymnoascus sp.	FCMR	cave sediment	New York, USA	JX270375	KF017652	KF017761
05NY09	Pseudogymnoascus sp.	FCMR	cave sediment	New York, USA	JX270388	KF017657	KF017766
07MA02	Pseudogymnoascus sp.	FCMR	cave sediment	Massachusetts, USA	JX270402	KF017658	KF017767
10NY08	Pseudogymnoascus sp.	FCMR	cave sediment	New York, USA	JX270432	KF017659	KF017769
10NY09	Pseudogymnoascus sp.	FCMR	cave sediment	New York, USA	JX270433	KF017660	KF017770
10NY10	Pseudogymnoascus sp.	FCMR	cave sediment	New York, USA	JX270434	na	KF017771
11MA03	Pseudogymnoascus sp.	FCMR	cave sediment	Massachusetts, USA	JX270438	KF017661	KF017772
11MA05	Pseudogymnoascus sp.	FCMR	cave sediment	Massachusetts, USA	JX270440	KF017662	KF017773
11MA07	Pseudogymnoascus sp.	FCMR	cave sediment	Massachusetts, USA	JX270442	KF017663	KF017774
11MA08	Pseudogymnoascus sp.	FCMR	cave sediment	Massachusetts, USA	JX270443	KF017664	KF017775
12NJ08	Undetermined	FCMR	cave sediment	New Jersey, USA	JX270454	KF017665	KF017776
12NJ10	Undetermined	FCMR	cave sediment	New Jersey, USA	JX270456	KF017666	KF017777
12NJ13	Pseudogymnoascus sp.	FCMR	cave sediment	New Jersey, USA	JX270459	KF017667	KF017778
14PA06	Pseudogymnoascus sp.	FCMR	cave sediment	Pennsylvania, USA	JX270469	KF017668	KF017779
15PA02	Undetermined	FCMR	cave sediment	Pennsylvania, USA	JX270477	NA	KF017780
15PA04	Leuconeurospora	FCMR	cave sediment	Pennsylvania, USA	JX270479	KF017669	KF017781
15PA11	Pseudogymnoascus sp.	FCMR	cave sediment	Pennsylvania, USA	JX270486	KF017671	KF017783
17WV02	Undetermined	FCMR	cave sediment	West Virginia, USA	JX270509	NA	KF017786
17WV03	Pseudogymnoascus sp.	FCMR	cave sediment	West Virginia, USA	JX270510	KF017672	KF017784
17WV06	Pseudogymnoascus sp.	FCMR	cave sediment	West Virginia, USA	JX270513	KF017673	KF017785
17WV09	Undetermined	FCMR	cave sediment	West Virginia, USA	JX270515	KF017674	KF017787
18VA07	Pseudogymnoascus sp.	FCMR FCMR	cave sediment	Virginia, USA	JX270527	KF017675	KF017788
18VA08	Pseudogymnoascus sp.	FCMR	cave sediment	Virginia, USA	JX270528	KF017676	KF017789
18VA12	Pseudogymnoascus sp.	FCMR	cave sediment	Virginia, USA	JX270532	NA	KF017790
18VA13	Pseudogymnoascus sp.	FCMR	cave sediment	Virginia, USA	JX270533	NA	KF017791
20631-21	Pseudogymnoascus destructans	FCMR	Mlf	New York, USA	EU884921	KF017691	KF017806
20KY08	Pseudogymnoascus sp.	FCMR	cave sediment	Kentucky, USA	JX270562	KF017677	KF017792
20KY10	Pseudogymnoascus sp.	FCMR	cave sediment	Kentucky, USA	JX270563	KF017678	KF017793
20KY12	Pseudogymnoascus sp.	FCMR	cave sediment	Kentucky, USA	JX270565	KF017679	KF017794
21IN01	Pseudogymnoascus sp.	FCMR	cave sediment	Indiana, USA	JX270568	KF017680	KF017795
21IN05	Pseudogymnoascus sp.	FCMR	cave sediment	Indiana, USA	JX270572	KF017681	KF017796
21IN10	Pseudogymnoascus sp.	FCMR	cave sediment	Indiana, USA	JX270577	KF017682	KF017797
22984-1-I1	Pseudogymnoascus sp.	FCMR	Psf	Tennessee, USA	JX415262	KF017692	KF017807
23014-1-I6	Pseudogymnoascus sp.	FCMR	Lnf	Tennessee, USA	JX512256	KF017693	KF017808
23342-1-I1	Pseudogymnoascus sp.	FCMR	Psf	Wisconsin, USA	JX415266	KF017694	KF017809
23WI05	Geomyes sp.	FCMR	cave sediment	Wisconsin, USA	JX270595	KF017683	KF017798
23WI08	Undetermined	FCMR	cave sediment	Wisconsin, USA	JX270598	NA	KF017799
23WI14	Undetermined	FCMR	cave sediment	Wisconsin, USA	JX270604	KF017684	NA
24MN04	Pseudogymnoascus sp.	FCMR	cave sediment	Minnesota, USA	JX270612	KF017685	KF017800
24MN06	Pseudogymnoascus sp.	FCMR	cave sediment	Minnesota, USA	JX270614	KF017686	KF017801
24MN13	Pseudogymnoascus sp.	FCMR	cave sediment	Minnesota, USA	JX270621	KF017687	KF017802
24MN14	Pseudogymnoascus sp.	FCMR	cave sediment	Minnesota, USA	JX270622	KF017688	KF017803
24MN18	Pseudogymnoascus sp.	FCMR	cave sediment	Minnesota, USA	JX270626	KF017689	KF017804
A07MA10	Pseudogymnoascus sp.	FCMR	cave sediment	Massachusetts, USA	KF039893	NA	KF017768
CBS 108.14	Geomyces auratus	CBS	soil	Norway	KF039895	KF017690	KF017805
MN-Mycosel7	Pseudogymnoascus sp.	FCMR	cave sediment	Minnesota, USA	KF039899	KF017698	KF017813
RMF 7792	Pseudogymnoascus sp.	FCMR	soil	Wyoming, USA	KF039898	KF017697	KF017812
RMF C 101	Pseudogymnoascus sp.	FCMR	desert	Utah, USA	KF039896	KF017695	KF017810
WSF 3629	Pseudogymnoascus sp.	FCMR	peat	Wisconsin, USA	KF039897	KF017696	KF017811
